Average number of worms per person  
in the general population

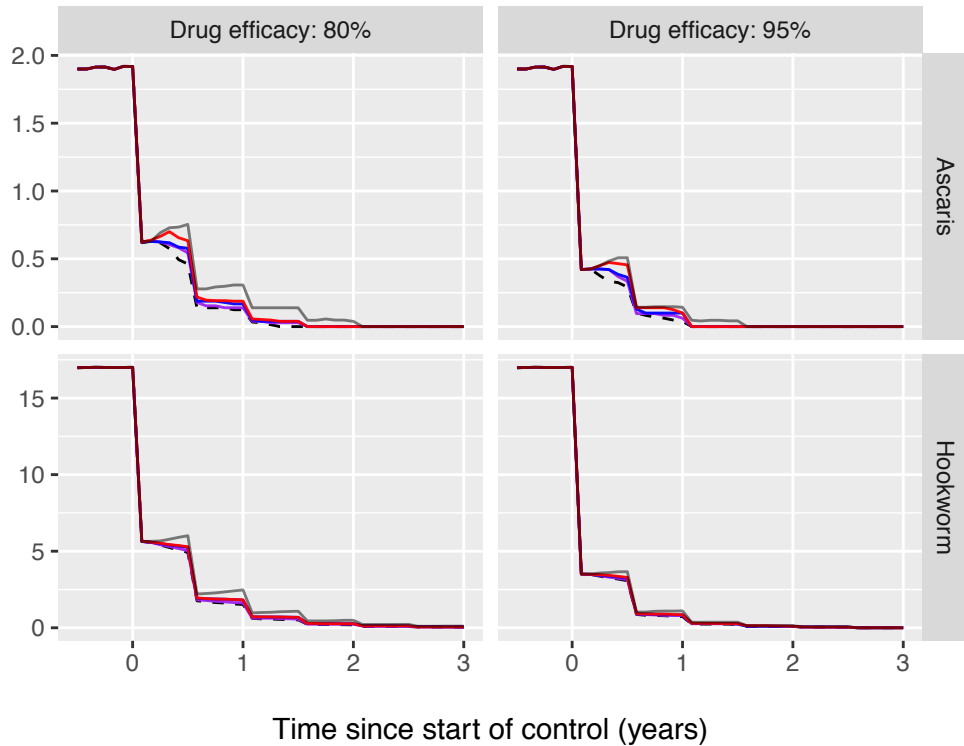

### WASH

- None
- Sanitation
- Hygiene
- Sanit. + Hyg.
- - Theoretical max. effect

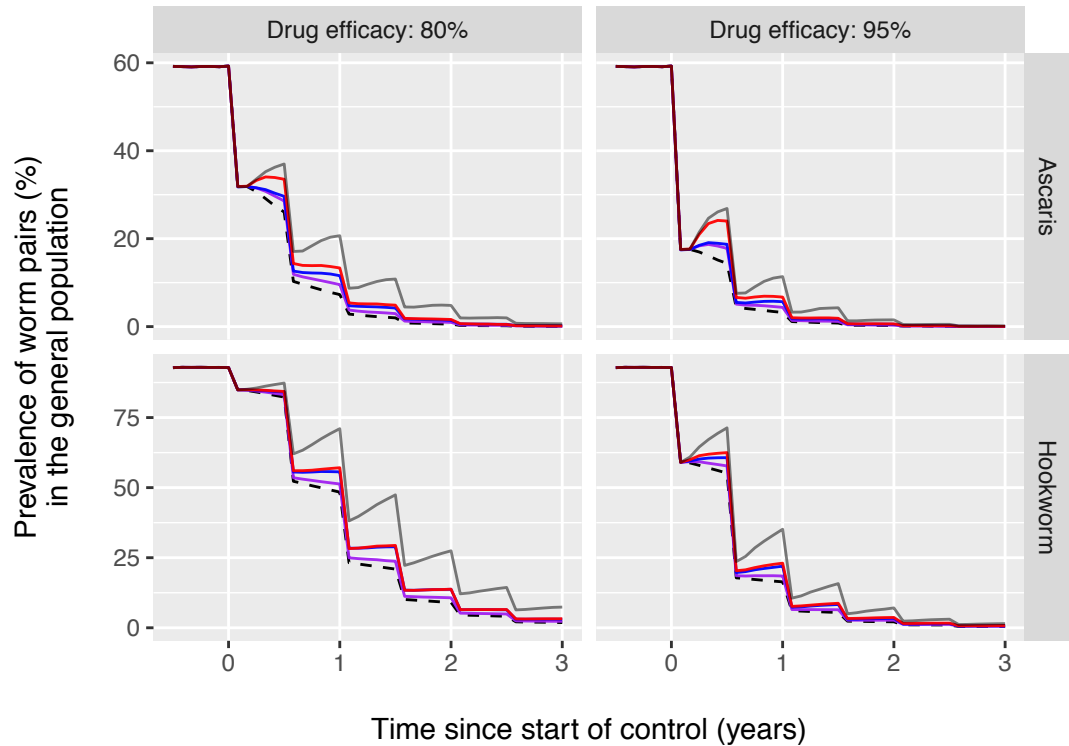

### WASH

- None
- Sanitation
- Hygiene
- Sanit. + Hyg.
- - Theoretical max. effect
