# Hookworm

## PCT targeted at SAC

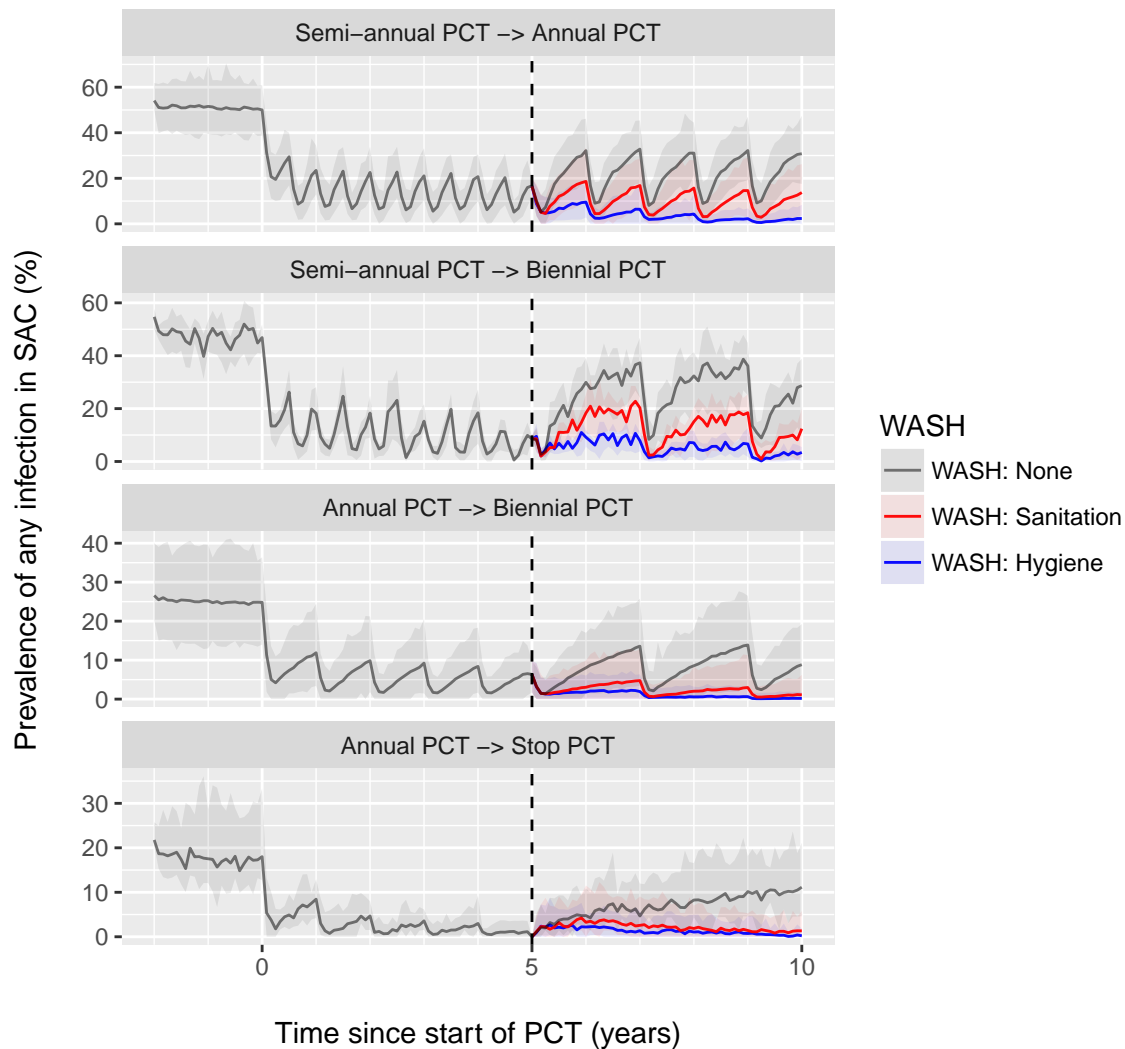

# Hookworm

## Community-wide PCT

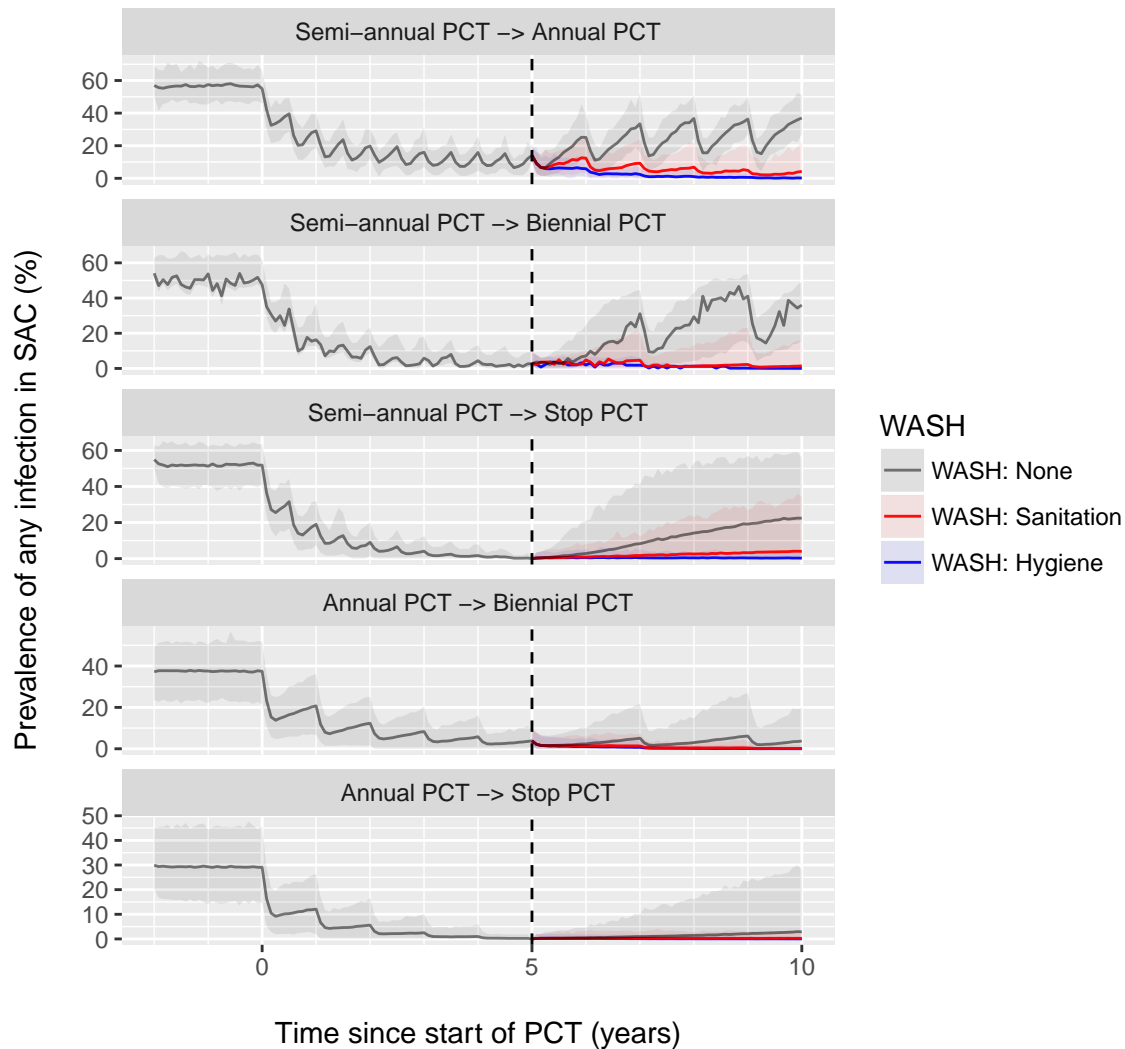

# Ascaris

PCT targeted at SAC

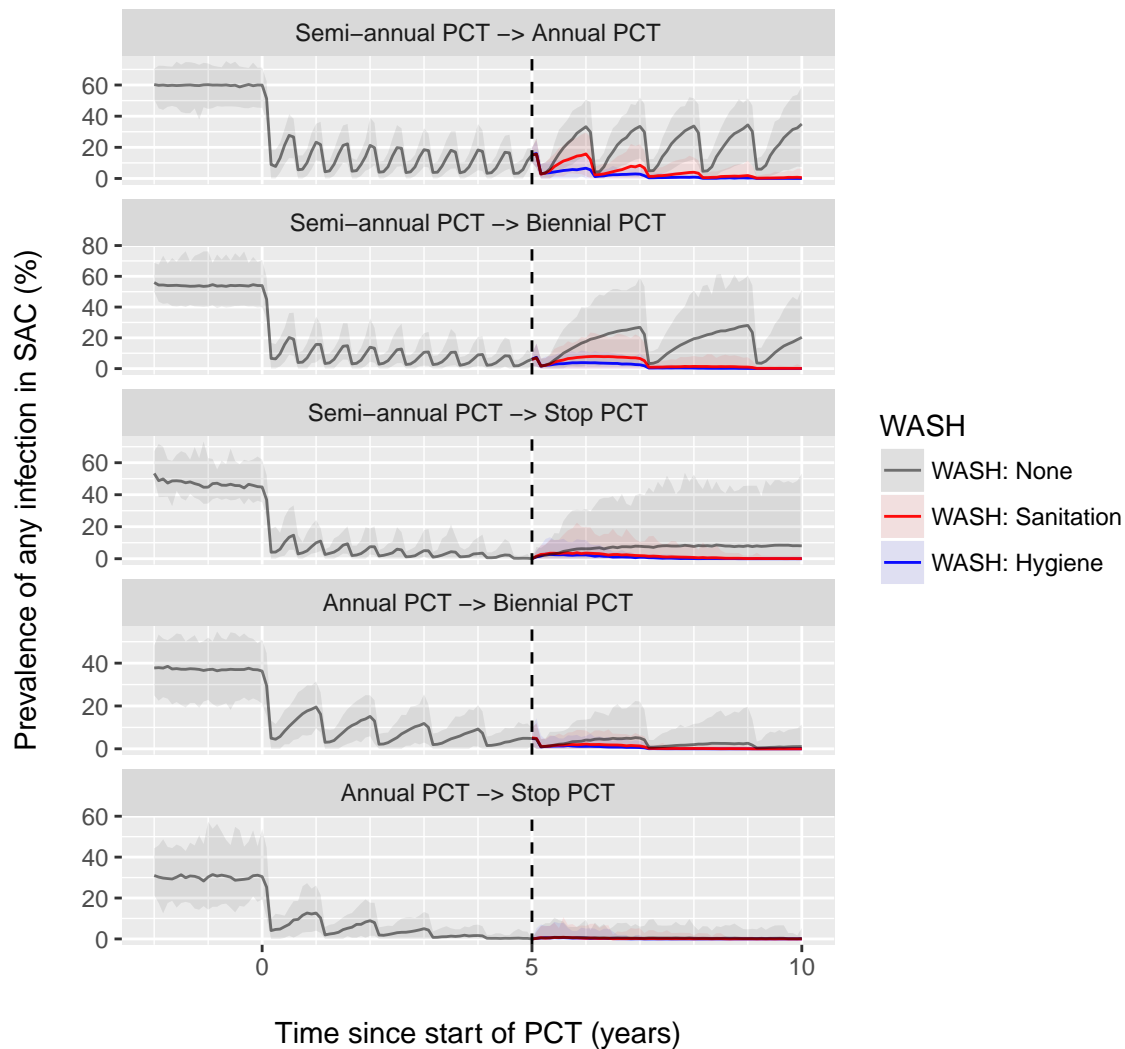

# Ascaris

## Community-wide PCT

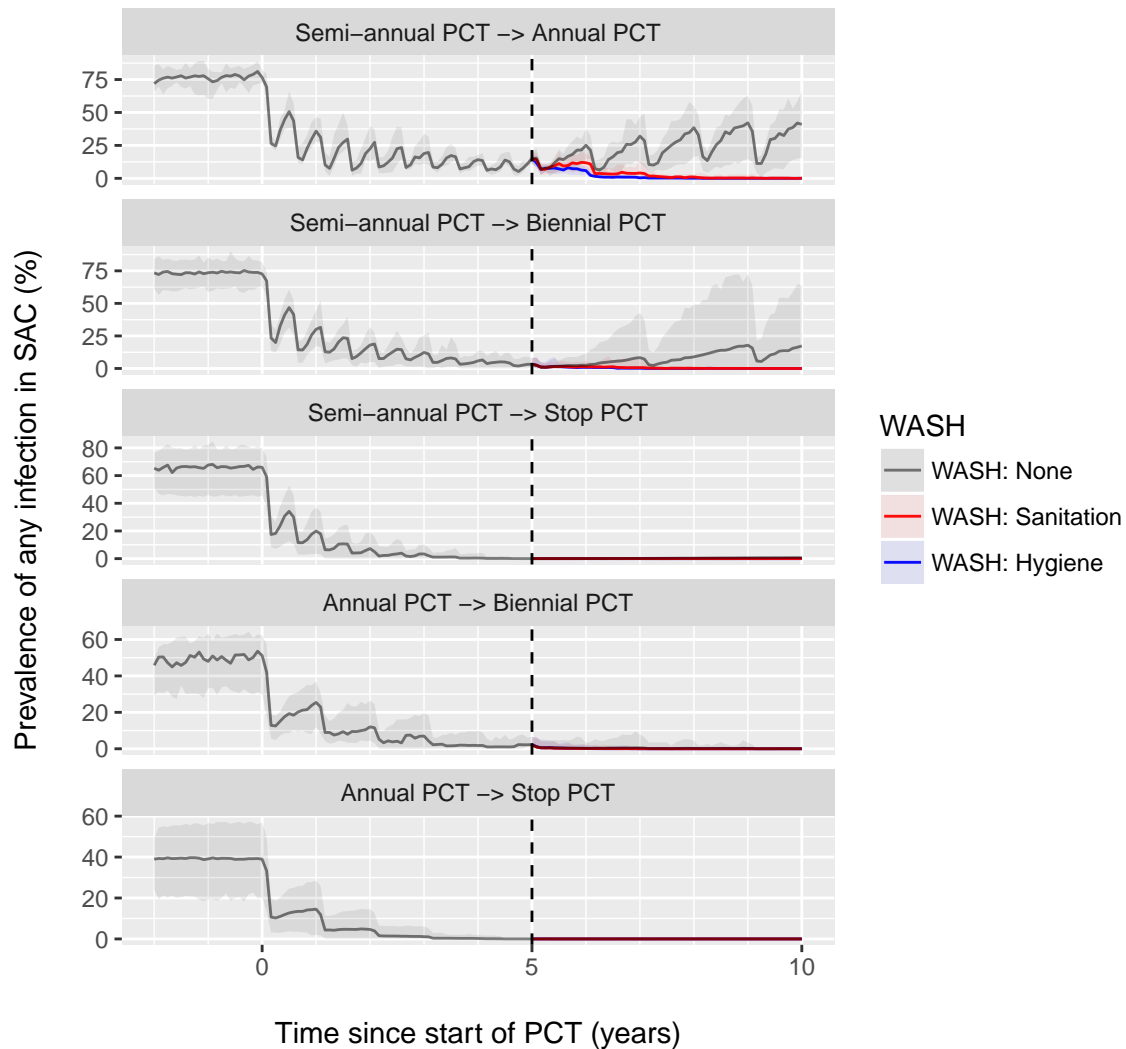

# Trichuris

PCT targeted at SAC

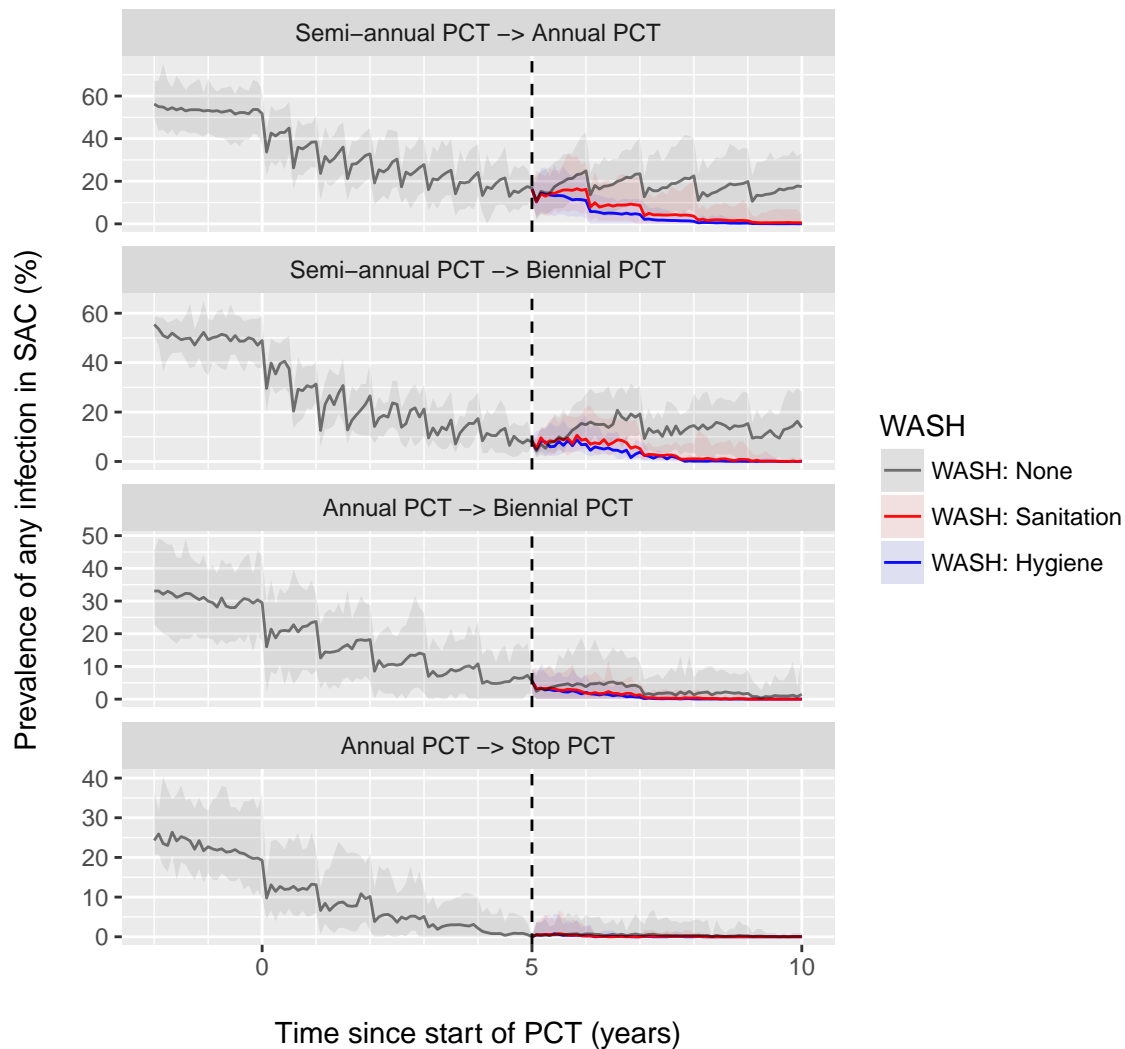

# Trichuris

## Community-wide PCT

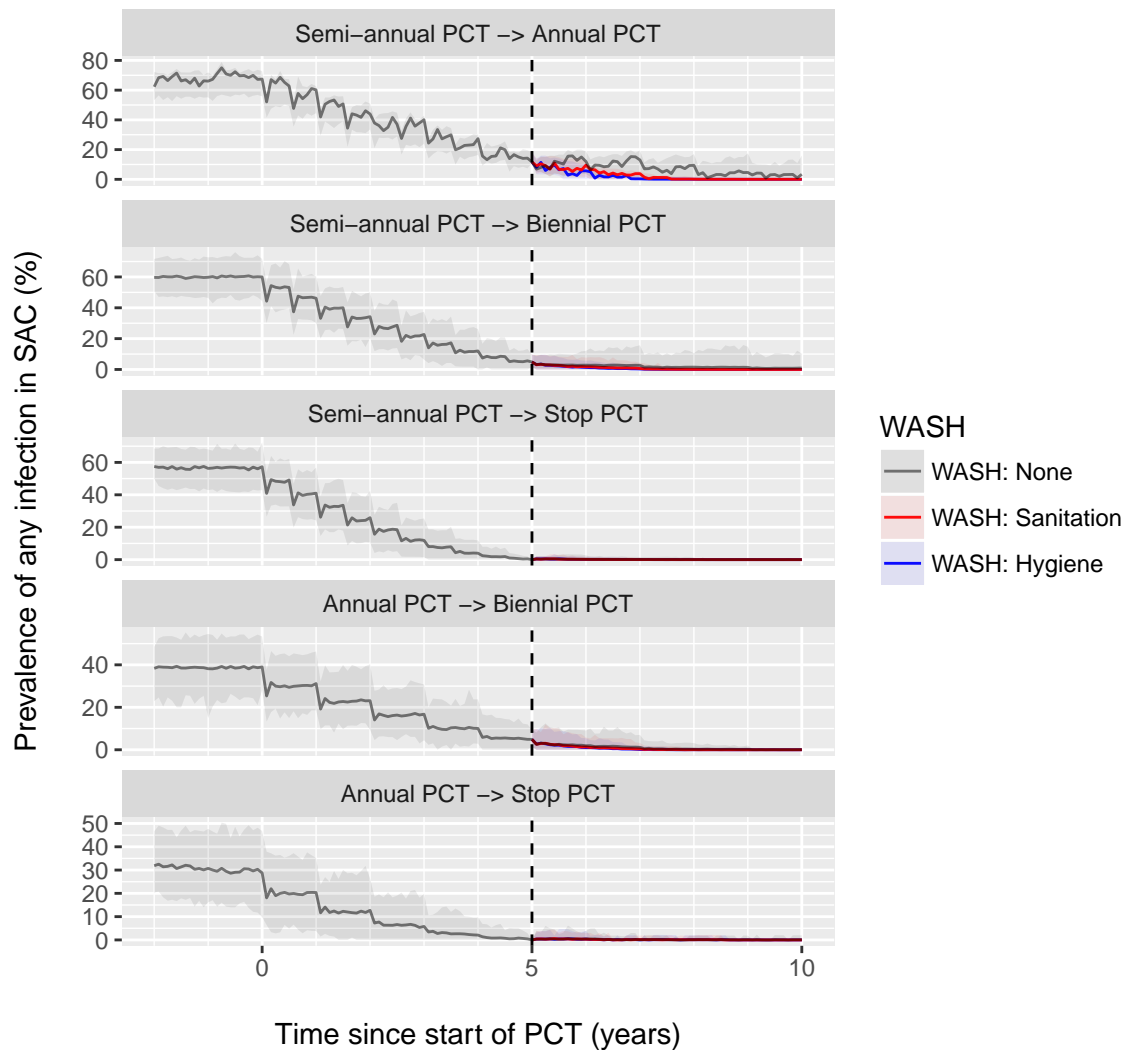

Source: https://storage.googleapis.com/plos-corpus-prod/10.1371/journal.pntd.0006758/1/pntd.0006758.s005.pdf
