# Supplementary material for: Predicted short and long-term impact of deworming and water, hygiene, and sanitation on transmission of soil-transmitted helminths
Source: PubMed Central journal article supplement (PMC6283645; doi:10.1371/journal.pntd.0006758), 2018-12-06

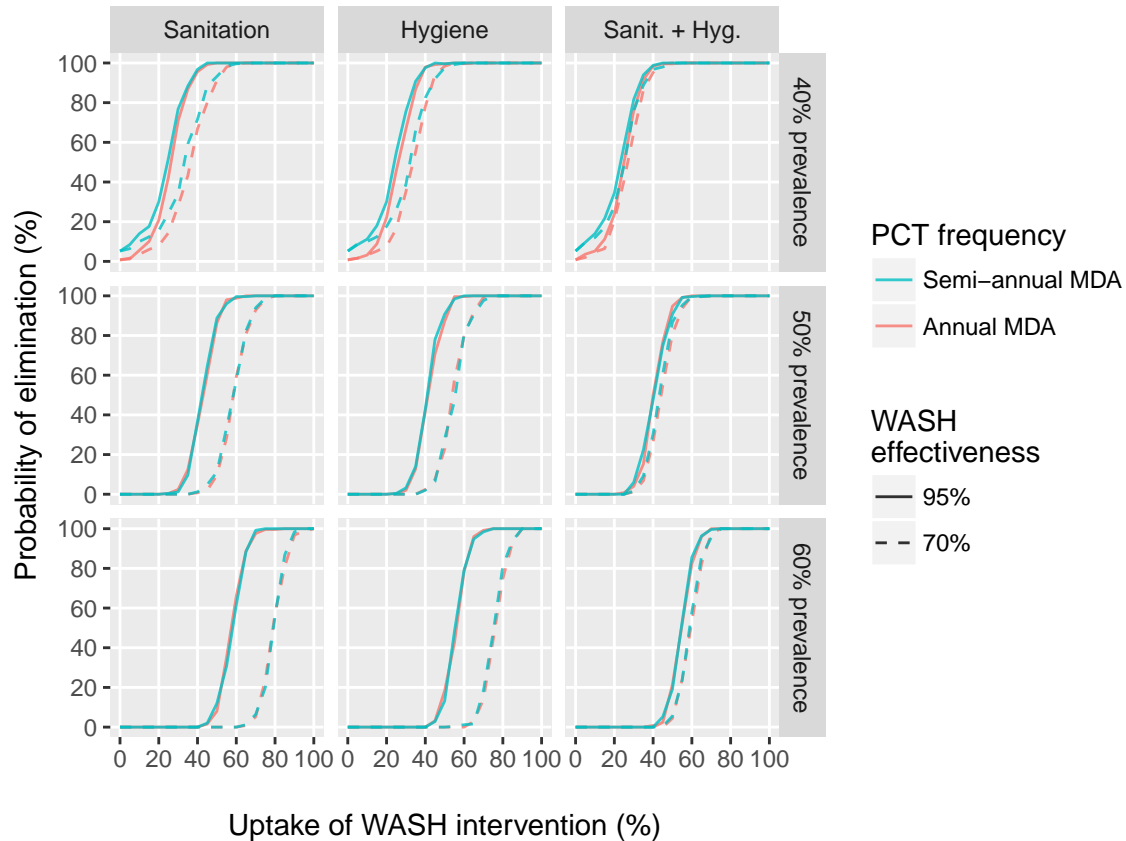

Supplement: pntd.0006758.s006.pdf [file pntd.0006758.s006.pdf]
