# Supplementary material for: Predicted short and long-term impact of deworming and water, hygiene, and sanitation on transmission of soil-transmitted helminths
Source: PLOS journal article supplement (doi:10.1371/journal.pntd.0006758), 2018-12-06
Supplement: S4 (10.1371/journal.pntd.0006758.s004) [file journal.pntd.0006758.s004]

Prevalence of infection (%)  
in the general population

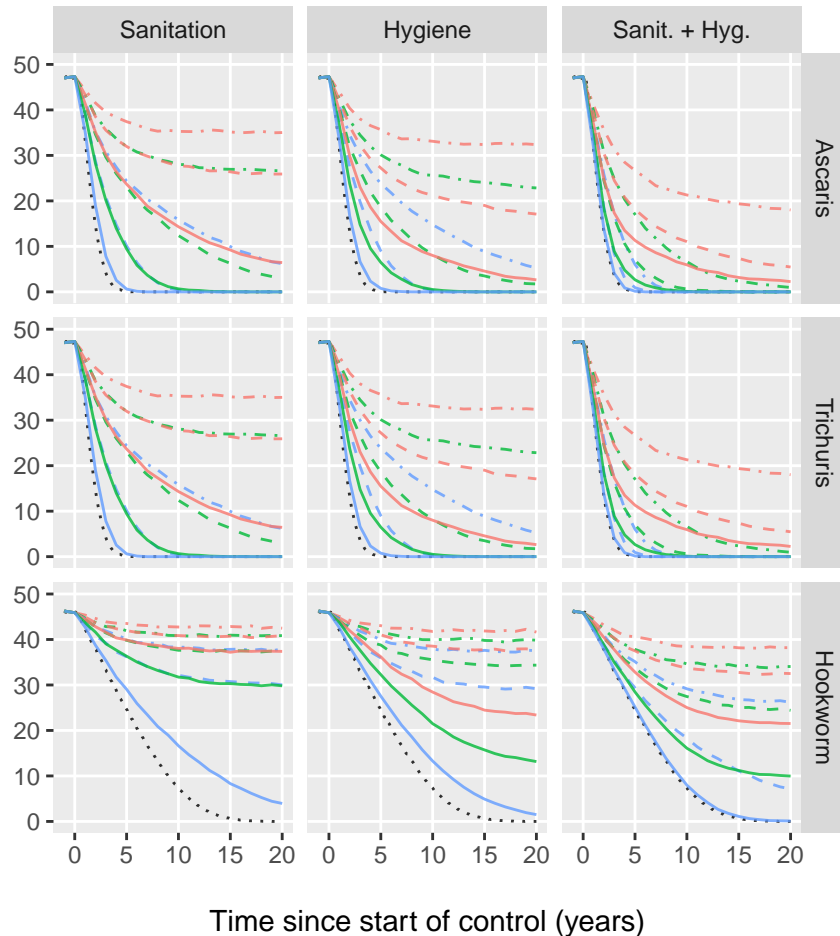

## WASH uptake and effectiveness

- 50% uptake, 50% effectiveness
- 50% uptake, 70% effectiveness
- 50% uptake, 95% effectiveness
- 70% uptake, 50% effectiveness
- 70% uptake, 70% effectiveness
- 70% uptake, 95% effectiveness
- 95% uptake, 50% effectiveness
- 95% uptake, 70% effectiveness
- 95% uptake, 95% effectiveness
- Theoretical max. effect
